# Supplementary material
Source: PubMed Central journal article supplement (PMC5563951)
Supplement: ismej201762x7.pdf [file ismej201762x7.pdf]

Table S1

| Species                             | Code          | Genus             | Tribe        | Origin     | #<br>Individuals<br>with<br>sequenced<br>microbiota | Diet information                                                                           |                                |                                                                              | Morphological data <sup>2</sup> |                                     |               |                      |                  |                            |                            |                                            |
|-------------------------------------|---------------|-------------------|--------------|------------|-----------------------------------------------------|--------------------------------------------------------------------------------------------|--------------------------------|------------------------------------------------------------------------------|---------------------------------|-------------------------------------|---------------|----------------------|------------------|----------------------------|----------------------------|--------------------------------------------|
|                                     |               |                   |              |            |                                                     | Gut content (with main food source bolded)                                                 | Main reference for gut content | Additional references                                                        | Diet_category                   | Approximate Metabolism <sup>1</sup> | # Individuals | gut_length_mean (mm) | gut_length_stdev | gut_length/SW <sup>3</sup> | gut_length/SL <sup>4</sup> | References                                 |
| <i>Konia dikume</i>                 | <b>Kondik</b> | Konia             | Oreochromini | Barombi    | 4                                                   | <b>mosquito larvae (genus <i>Chaoborus</i>)</b> , organic debris                           | Trewavas et al. 1992           | unpublished observations (stable isotopes and trophic morphology)            | I                               | Pr                                  | 5             | 32,30                | 5,85             | 1,00                       | 0,31                       | this study                                 |
| <i>Pungu maclareni</i>              | <b>Punmac</b> | Pungu             | Oreochromini | Barombi    | 5                                                   | <b>sponges</b> , organic debris and insect larvae                                          | Trewavas et al. 1992           | unpublished observations (stable isotopes and trophic morphology)            | O                               | Pr                                  | 5             | 27,50                | 1,12             | 1,79                       | 0,36                       | this study                                 |
| <i>Stomatepia mariae</i>            | <b>Stomar</b> | Stomatepia        | Oreochromini | Barombi    | 4                                                   | <b>insects</b>                                                                             | Trewavas et al. 1992           | unpublished observations (stable isotopes and trophic morphology)            | C                               | Pr                                  | 5             | 17,00                | 1,84             | 1,04                       | 0,20                       | this study                                 |
| <i>Stomatepia pindu</i>             | <b>Stopin</b> | Stomatepia        | Oreochromini | Barombi    | 5                                                   | <b>Insects</b>                                                                             | Trewavas et al. 1992           | unpublished observations (stable isotopes and trophic morphology)            | C                               | Pr                                  | 5             | 11,44                | 3,39             | 1,33                       | 0,17                       | this study                                 |
| <i>Myaka myaka</i>                  | <b>Myamya</b> | Myaka             | Oreochromini | Barombi    | 4                                                   | <b>phytoplankton</b> and small insects                                                     | Trewavas et al. 1992           | unpublished observations (stable isotopes and trophic morphology)            | P                               | F                                   | 5             | 20,70                | 0,91             | 2,03                       | 0,28                       | this study                                 |
| <i>Sarotherodon caroli</i>          | <b>Sarcar</b> | Sarotherodon      | Oreochromini | Barombi    | 4                                                   | <b>phytoplankton</b>                                                                       | Trewavas et al. 1992           | unpublished observations (stable isotopes and trophic morphology)            | P                               | F                                   | 5             | 67,80                | 10,80            | 0,94                       | 0,52                       | this study                                 |
| <i>Sarotherodon linnellii</i>       | <b>Sarlin</b> | Sarotherodon      | Oreochromini | Barombi    | 5                                                   | <b>phytoplankton</b>                                                                       | Trewavas et al. 1992           | unpublished observations (stable isotopes and trophic morphology)            | P                               | F                                   | 5             | 80,20                | 16,04            | 0,56                       | 0,48                       | this study                                 |
| <i>Konia eisentrauti</i>            | <b>Koneis</b> | Konia             | Oreochromini | Barombi    | 4                                                   | <b>organic debris, insects</b> and plants                                                  | Trewavas et al. 1992           | unpublished observations (stable isotopes and trophic morphology)            | O                               | F                                   | 5             | 16,50                | 4,96             | 1,40                       | 0,23                       | this study                                 |
| <i>Sarotherodon lohbergeri</i>      | <b>Sarloh</b> | Sarotherodon      | Oreochromini | Barombi    | 3                                                   | <b>organic debris</b> , diatoms, sponge spicules, filamentous algae, surface fallen plants | Trewavas et al. 1992           | unpublished observations (stable isotopes and trophic morphology)            | H                               | F                                   | 5             | 67,40                | 9,15             | 2,63                       | 0,73                       | this study                                 |
| <i>Sarotherodon steinbachi</i>      | <b>Sarste</b> | Sarotherodon      | Oreochromini | Barombi    | 5                                                   | <b>organic debris</b> , diatoms, sponge spicules, surface fallen plants                    | Trewavas et al. 1992           | unpublished observations (stable isotopes and trophic morphology)            | H                               | F                                   | 5             | 97,40                | 4,77             | 5,19                       | 1,12                       | this study                                 |
| <i>Plecodus straeleni</i>           | <b>Plestr</b> | Plecodus          | Perissodini  | Tanganyika | 3                                                   | <b>fish scales</b> and skin                                                                | Muschick et al. 2012           | Muschick et al. 2014; Takahashi et al. 2007                                  | SC                              | Pr                                  | 5             | 108,00               | 36,33            | 6,51                       | 1,27                       | Muschick et al. 2012; Muschick et al. 2014 |
| <i>Lamprologus lemairii</i>         | <b>Lamlem</b> | Lamprologus       | Lamprologini | Tanganyika | 4                                                   | <b>crustaceans</b> and fish remains                                                        | Muschick et al. 2012           | Muschick et al. 2014; Wagner et al. 2009                                     | C                               | Pr                                  | 5             | 115,00               | 35,00            | 3,64                       | 1,02                       | Muschick et al. 2012; Muschick et al. 2014 |
| <i>Lepidolamprologus eolongatus</i> | <b>Lepelo</b> | Lepidolamprologus | Lamprologini | Tanganyika | 3                                                   | <b>fish remains</b> , crustaceans and insects                                              | Muschick et al. 2012           | Muschick et al. 2014; Wagner et al. 2009                                     | C                               | Pr                                  | 10            | 76,50                | 17,49            | 4,89                       | 0,81                       | Muschick et al. 2012; Muschick et al. 2014 |
| <i>Lepidolamprologus attenuatus</i> | <b>Lepatt</b> | Lepidolamprologus | Lamprologini | Tanganyika | 5                                                   | <b>fishes remains, crustaceans, insects</b> , plants and sand                              | Muschick et al. 2012           | Muschick et al. 2014                                                         | C                               | Pr                                  | 10            | 66,00                | 21,19            | 6,15                       | 0,80                       | Muschick et al. 2012; Muschick et al. 2014 |
| <i>Altolamprologus fasciatus</i>    | <b>Altfas</b> | Altolamprologus   | Lamprologini | Tanganyika | 5                                                   | <b>insects</b> , crustaceans, fish remains                                                 | Muschick et al. 2012           | Muschick et al. 2014                                                         | C                               | Pr                                  | 8             | 105,63               | 23,37            | 8,87                       | 1,19                       | Muschick et al. 2012; Muschick et al. 2014 |
| <i>Enantlopus melanogenys</i>       | <b>Enamel</b> | Enantlopus        | Ectodini     | Tanganyika | 2                                                   | <b>insects</b> , mollusks, fish remains and plants                                         | Muschick et al. 2012           | Muschick et al. 2014                                                         | C                               | Pr                                  | 7             | 127,14               | 28,12            | 12,06                      | 1,41                       | Muschick et al. 2012; Muschick et al. 2014 |
| <i>Gnathochromis pfefferi</i>       | <b>Gnapfe</b> | Gnathochromis     | Tropheini    | Tanganyika | 2                                                   | <b>insects, crustaceans</b> and sand                                                       | Muschick et al. 2012           | Muschick et al. 2014                                                         | C                               | Pr                                  | 7             | 126,43               | 58,93            | 11,14                      | 1,72                       | Muschick et al. 2012; Muschick et al. 2014 |
| <i>Cypichromis coloratus</i>        | <b>Cypcol</b> | Cypichromis       | Cypichromini | Tanganyika | 3                                                   | <b>Insects</b> and crustaceans (zooplankton)                                               | Muschick et al. 2012           | Muschick et al. 2014                                                         | P                               | Pr                                  | 10            | 94,50                | 27,43            | 12,21                      | 1,82                       | Muschick et al. 2012; Muschick et al. 2014 |
| <i>Neolamprologus savoyi</i>        | <b>Neosav</b> | Neolamprologus    | Lamprologini | Tanganyika | 4                                                   | <b>insects, algae</b> and sand (plankton)                                                  | Muschick et al. 2012           | Muschick et al. 2014                                                         | P                               | F                                   | 11            | 66,82                | 23,59            | 11,73                      | 1,14                       | Muschick et al. 2012; Muschick et al. 2014 |
| <i>Aulonochranus dewindtii</i>      | <b>Audelw</b> | Aulonochranus     | Ectodini     | Tanganyika | 5                                                   | <b>insects, crustaceans and algae</b>                                                      | Muschick et al. 2012           | Muschick et al. 2014                                                         | O                               | F                                   | 9             | 116,67               | 66,19            | 8,68                       | 1,46                       | Muschick et al. 2012; Muschick et al. 2014 |
| <i>Ctenochormis horei</i>           | <b>Ctehor</b> | Ctenochormis      | Tropheini    | Tanganyika | 4                                                   | <b>insects, crustaceans, algae, plants</b> and sand                                        | Muschick et al. 2012           | Muschick et al. 2014                                                         | O                               | F                                   | 11            | 222,27               | 47,61            | 12,11                      | 2,33                       | Muschick et al. 2012; Muschick et al. 2014 |
| <i>Julidochromis ornatus</i>        | <b>Julorn</b> | Julidochromis     | Lamprologini | Tanganyika | 5                                                   | <b>algae, insects</b> , plants, mollusks and sand                                          | Muschick et al. 2012           | Muschick et al. 2014                                                         | O                               | F                                   | 8             | 63,13                | 21,03            | 23,81                      | 1,25                       | Muschick et al. 2012; Muschick et al. 2014 |
| <i>Xenotilapia spiloteria</i>       | <b>Xenspi</b> | Xenotilapia       | Ectodini     | Tanganyika | 5                                                   | <b>mollusks, insects, sand</b> , algae and plants                                          | Muschick et al. 2012           | Muschick et al. 2014                                                         | O                               | F                                   | 3             | 121,67               | 32,53            | 17,20                      | 1,72                       | Muschick et al. 2012; Muschick et al. 2014 |
| <i>Variabilichromis moorii</i>      | <b>Varmoo</b> | Variabilichromis  | Lamprologini | Tanganyika | 2                                                   | <b>algae</b> (browser), plants and insects                                                 | Muschick et al. 2012           | Muschick et al. 2014; Hata et al. 2014; Hata et al. 2015; Ota et al. 2012    | H                               | F                                   | 10            | 170,00               | 50,28            | 15,76                      | 2,41                       | Muschick et al. 2012; Muschick et al. 2014 |
| <i>Neolamprologus pulcher</i>       | <b>Neopul</b> | Neolamprologus    | Lamprologini | Tanganyika | 5                                                   | <b>algae, sand, plants</b> and crustaceans (plankton)                                      | Muschick et al. 2012           | Muschick et al. 2014                                                         | H                               | F                                   | 9             | 111,11               | 24,85            | 19,27                      | 1,88                       | Muschick et al. 2012; Muschick et al. 2014 |
| <i>Interochromis loockii</i>        | <b>Intloo</b> | Interochromis     | Tropheini    | Tanganyika | 5                                                   | <b>algae</b> (grazer)                                                                      | Muschick et al. 2012           | Muschick et al. 2014; Hata et al. 2014; Hata et al. 2015                     | H                               | F                                   | 11            | 750,45               | 238,96           | 26,34                      | 8,00                       | Muschick et al. 2012; Muschick et al. 2014 |
| <i>Ophthalmotilapia ventralis</i>   | <b>Ophven</b> | Ophthalmotilapia  | Ectodini     | Tanganyika | 3                                                   | <b>algae</b> and insects                                                                   | Muschick et al. 2012           | Muschick et al. 2014                                                         | H                               | F                                   | 12            | 408,33               | 44,53            | 28,54                      | 5,08                       | Muschick et al. 2012; Muschick et al. 2014 |
| <i>Eretmodus cyanostictus</i>       | <b>Erecya</b> | Eretmodus         | Eretmodini   | Tanganyika | 5                                                   | <b>algae</b> (scraper), plants and insects                                                 | Muschick et al. 2012           | Muschick et al. 2014; Hata et al. 2014; Hata et al. 2015; Wagner et al. 2009 | H                               | F                                   | 4             | 350,00               | 86,79            | 32,27                      | 5,25                       | Muschick et al. 2012; Muschick et al. 2014 |
| <i>Simochromis babaulti</i>         | <b>Simbab</b> | Simochromis       | Tropheini    | Tanganyika | 2                                                   | <b>plants</b> (browser)                                                                    | Muschick et al. 2012           | Muschick et al. 2012                                                         | H                               | F                                   | NA            | NA                   | NA               | NA                         | NA                         | Muschick et al. 2012; Muschick et al. 2014 |

<sup>1</sup> indicates whether a species regularly includes (F) or not (Pr) significant amount of vegetable material in its diet.<sup>2</sup> *C. leptosoma* was used as a proxy for *C. coloratus*<sup>3</sup> SW=specimen weight<sup>4</sup> SL= specimen length
